# Supplementary material for: Common ion effect enhanced Prussian blue analogues for aqueous ammonium ion storage
Source: Royal Society of Chemistry journal article supplement (doi:10.1039/d1dt00805f), 2021-01-01
Supplement: d1dt00805f1.pdf [file d1dt00805f1.pdf]

## Supporting Information

### Common ion effect enhanced Prussian blue analogue for aqueous ammonium ion storage

*Siyun Li<sup>1</sup>, Maoting Xia<sup>1</sup>, Chengxiang Xiao, Xikun Zhang, Haoxiang Yu, Liyuan  
Zhang, Jie Shu\**

*School of Materials Science and Chemical Engineering, Ningbo University, Ningbo,  
Zhejiang, 315211, China*

*<sup>1</sup> These authors contributed equally to this work.*

\* Corresponding author: Jie Shu

E-mail: [shujie@nbu.edu.cn](mailto:shujie@nbu.edu.cn)

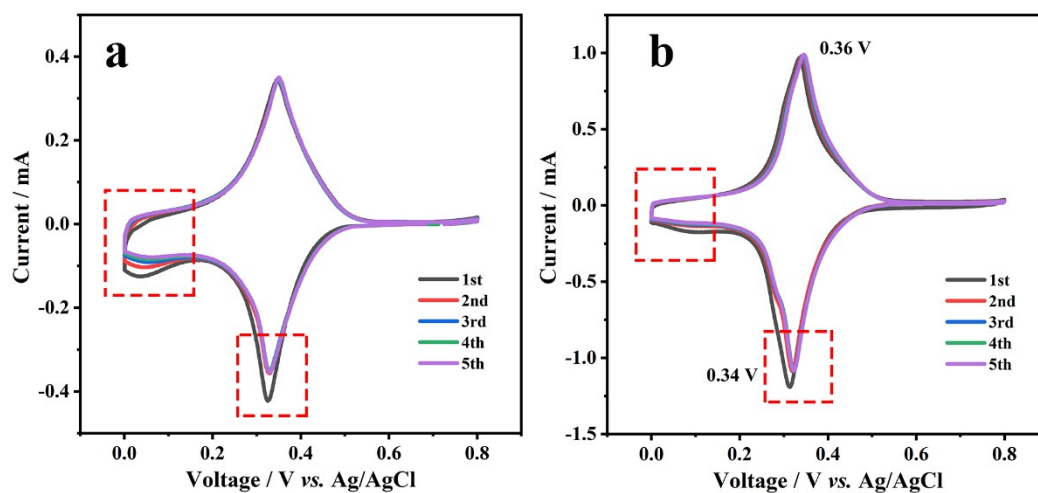

**Fig. S1.** (a) The first five CV curves of AIBs without additives at  $0.1 \text{ mV s}^{-1}$ . (b) The first five CV curves of AIBs with additives at  $0.1 \text{ mV s}^{-1}$ .

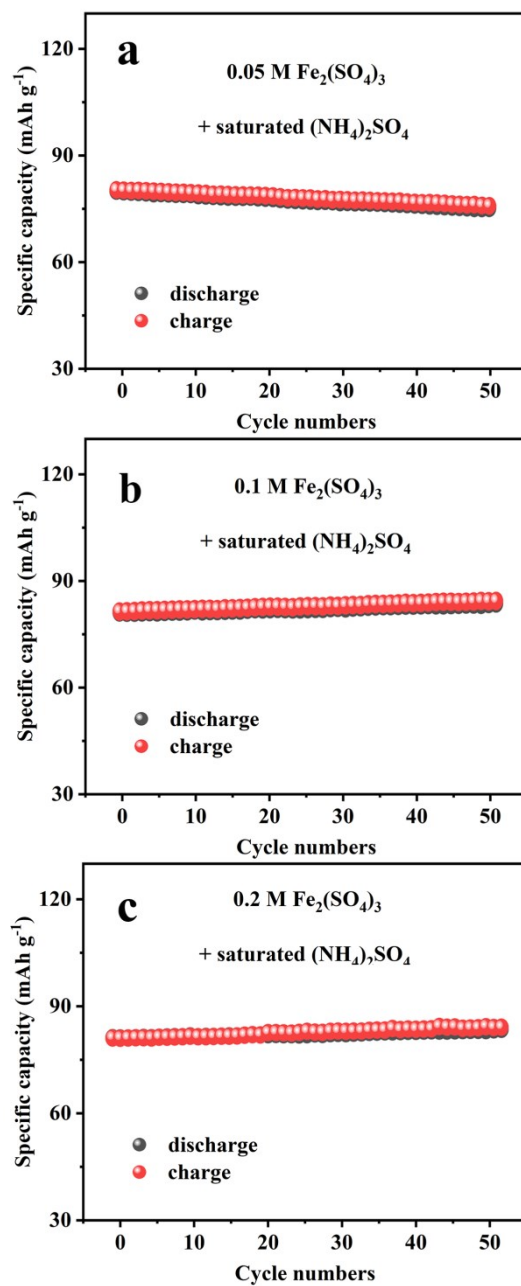

**Fig. S2.** Cycling performance of FeHCF in different concentrations of  $\text{Fe}_2(\text{SO}_4)_3$  additive. (a) 0.05 M  $\text{Fe}_2(\text{SO}_4)_3$ . (b) 0.1 M  $\text{Fe}_2(\text{SO}_4)_3$ . (c) 0.2 M  $\text{Fe}_2(\text{SO}_4)_3$ .

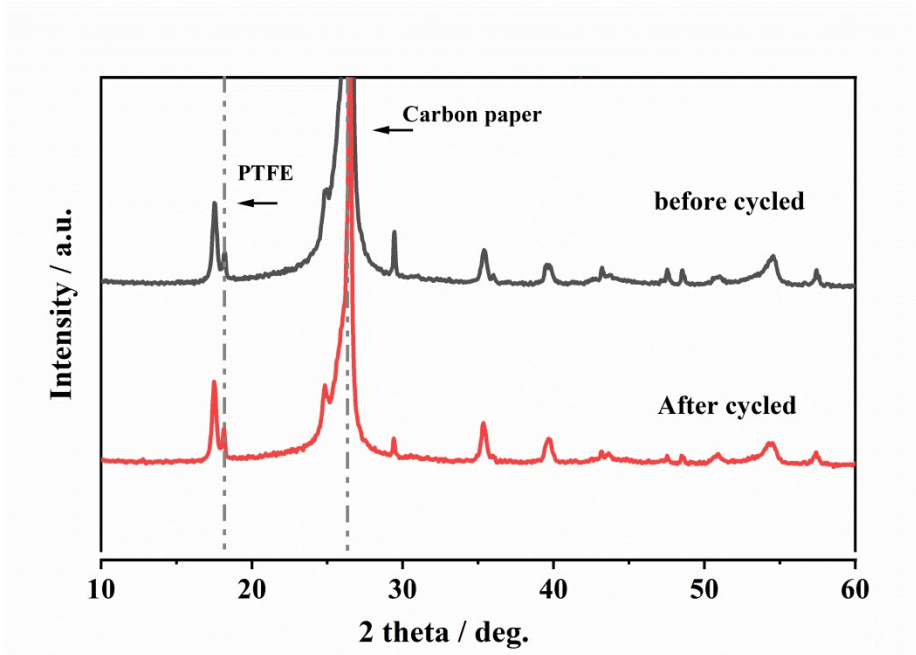

**Fig. S3.** XRD patterns of FeHCF electrode before and after cycled.

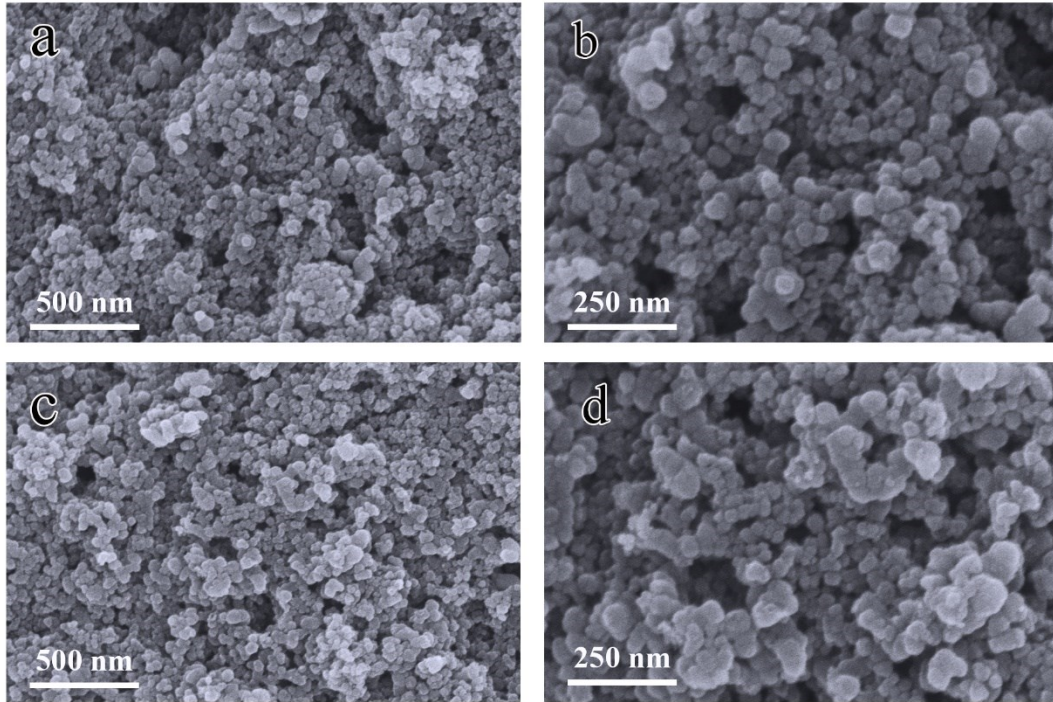

**Fig. S4.** (a, b) SEM images of pristine  $\text{FeFe}(\text{CN})_6$  electrode. (c, d) SEM images of cycled  $\text{FeFe}(\text{CN})_6$  electrode using electrolyte with additive after 500 cycles at  $50 \text{ mA g}^{-1}$ .

**Table S1.** The element content of FeHCF sample.

| Sample | Element | Content |
|--------|---------|---------|
| FeHCF  | Fe      | 4.56 %  |
|        | K       | 0.02 %  |

**Table S2.** The content of Fe element in the electrolyte before and after cycled.

|                               | Before cycled | After cycled |
|-------------------------------|---------------|--------------|
| Electrolyte without additives | 0 M           | 0.062 M      |
| Electrolyte with additives    | 0.104 M       | 0.108 M      |
